# Supplementary material
Source: PubMed Central journal article supplement (PMC7263925)

Supplemental Fig. 1.

Subgroup analyses of FPG in duration

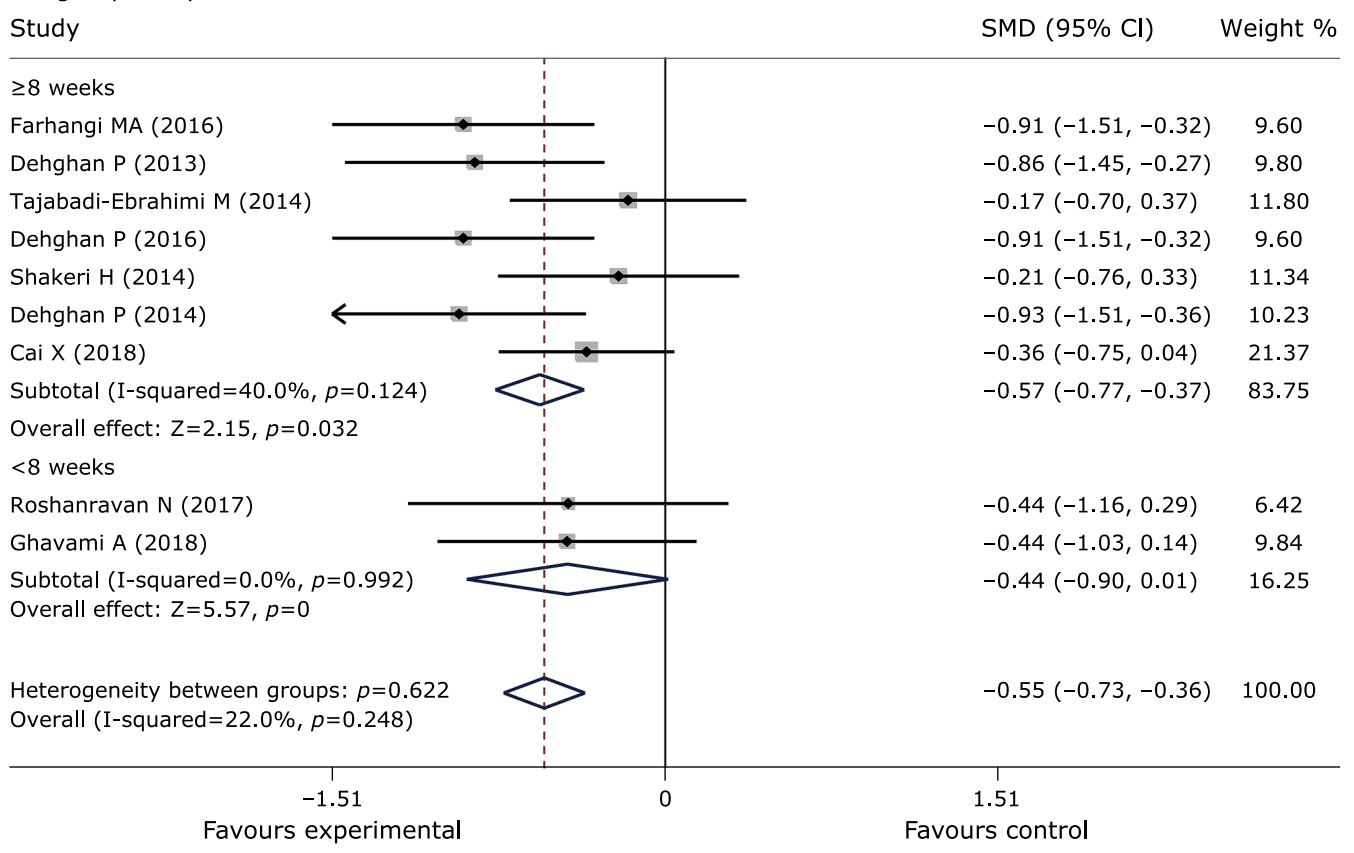

Subgroup analyses of insulin control in duration

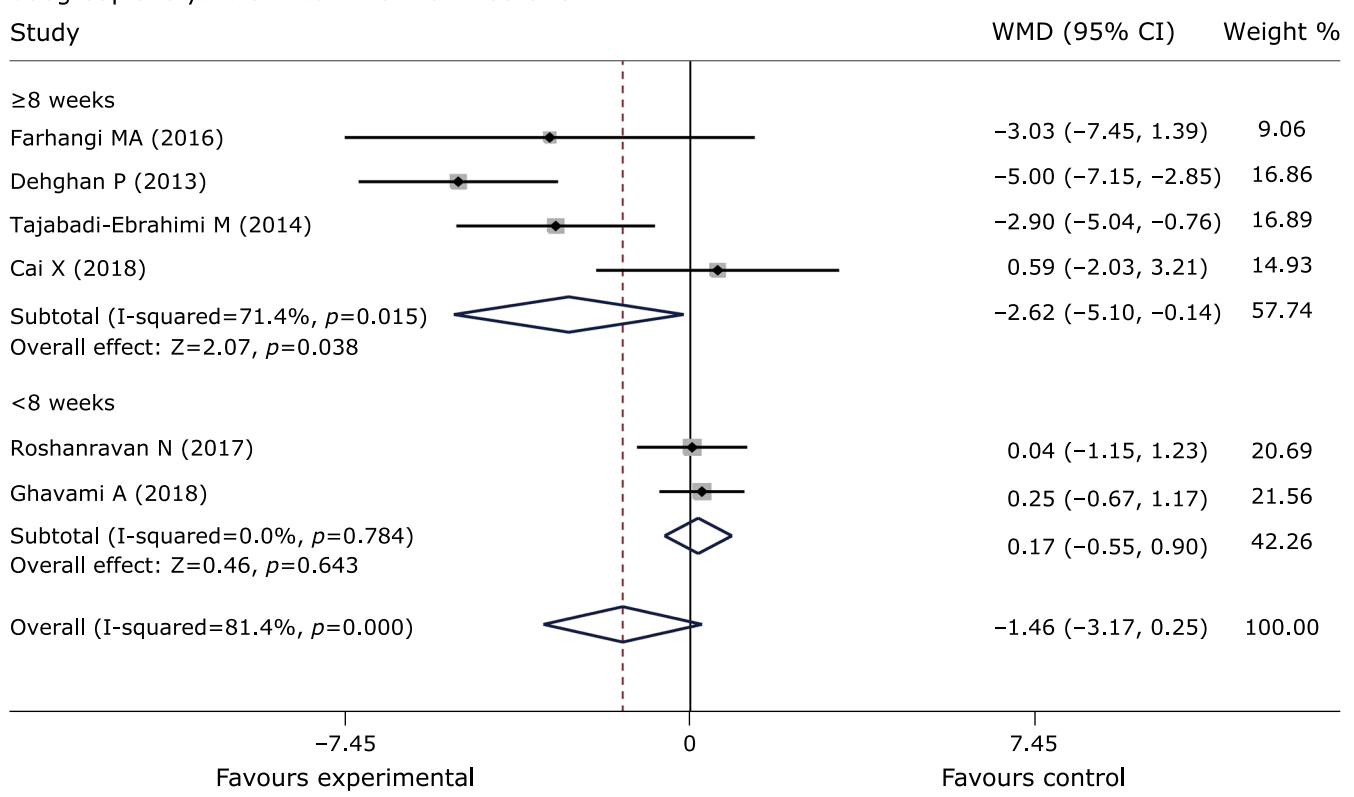

Subgroup analyses of HOMA-IR in duration

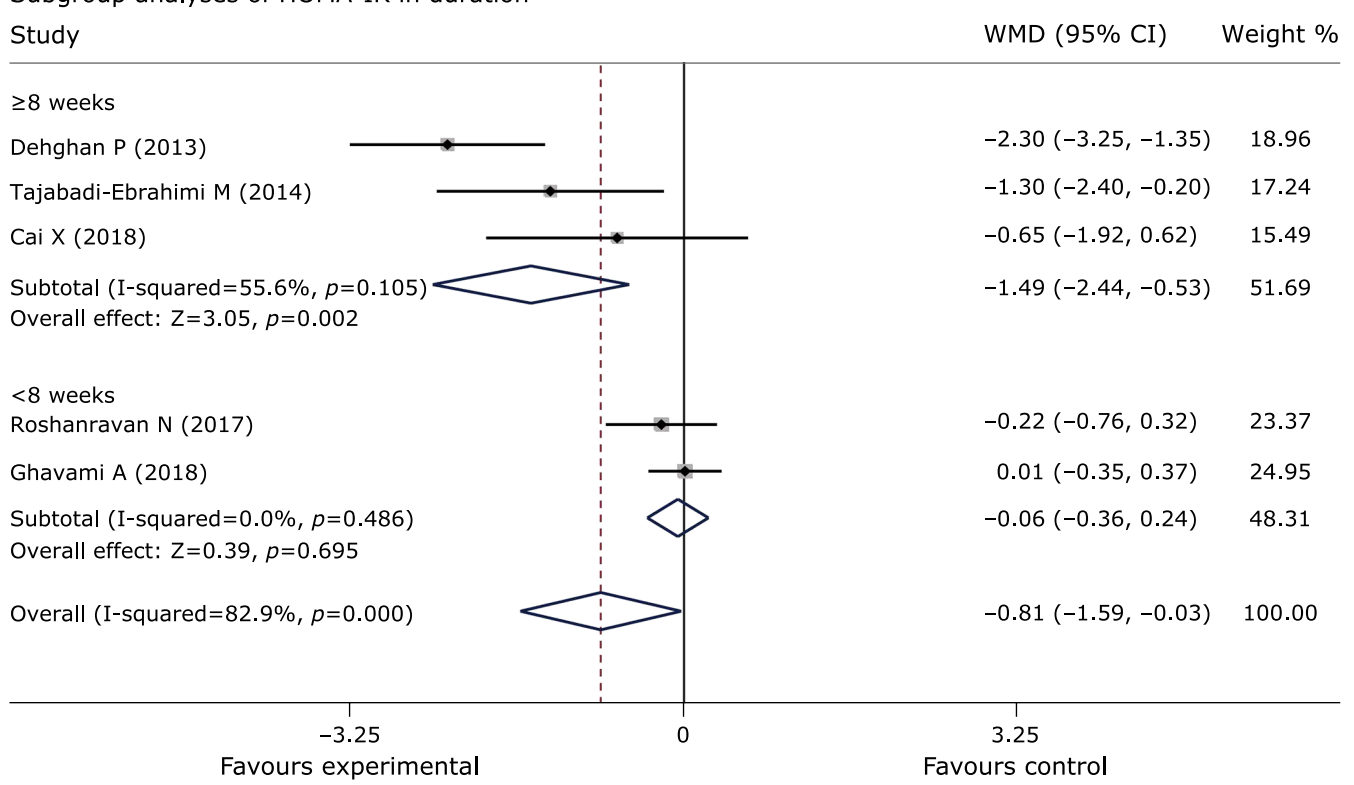

Subgroup analyses of Hba1c in duration

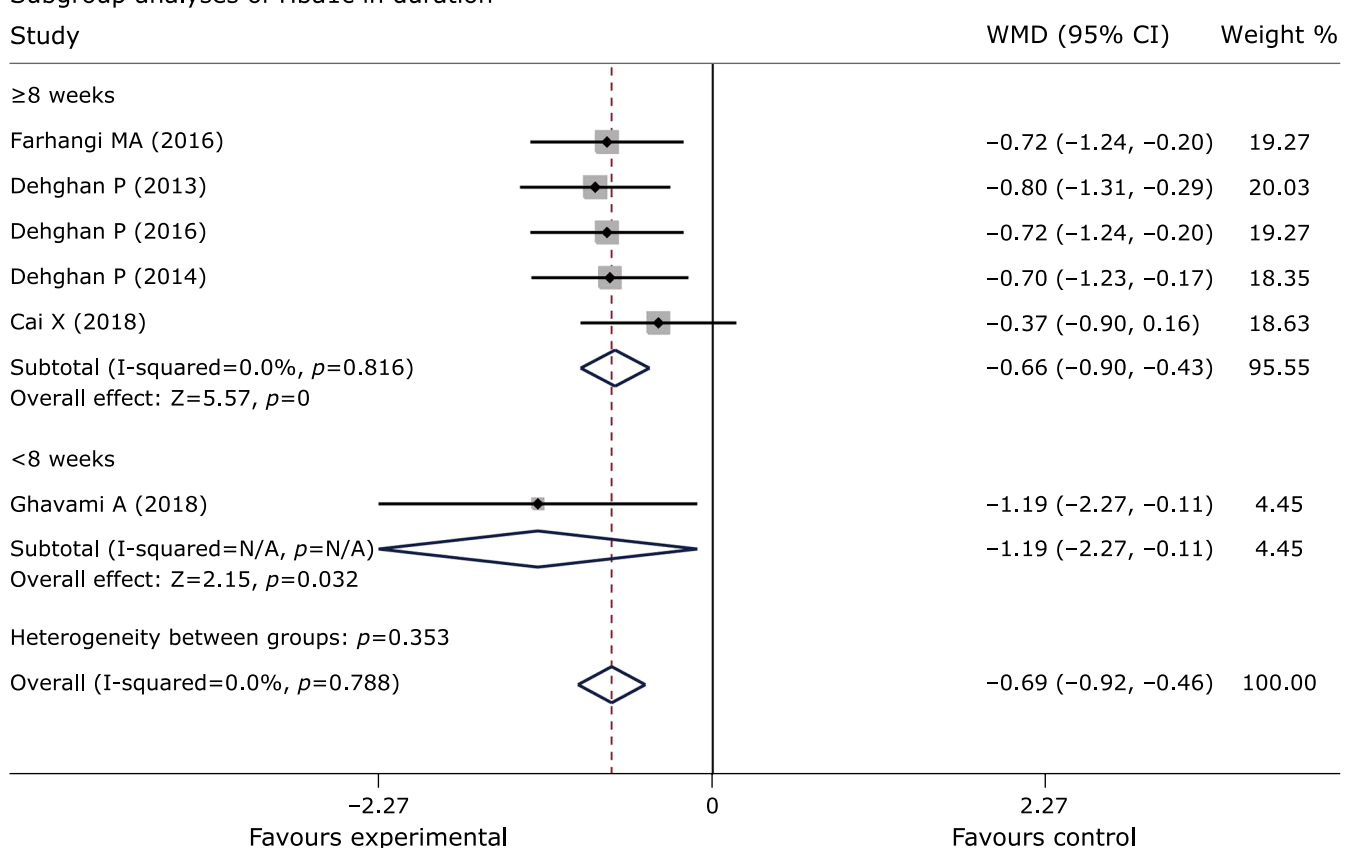

Supplement: jcbn19-103sf01.pdf [file jcbn19-103sf01.pdf]
