# Supplementary material
Source: PubMed Central journal article supplement (PMC7263925)
Supplement: jcbn19-103st01.pdf [file jcbn19-103st01.pdf]

**Supplemental Table 1.** Serum parameters in studies from before and after intervention

| Study                             | Outcome | Unit     | Experimental   |                | Control        |                |
|-----------------------------------|---------|----------|----------------|----------------|----------------|----------------|
|                                   |         |          | Before         | After          | Before         | After          |
| Cai X <i>et al.</i>               | FPG     | mmol/L   | 8.4 ± 2.95     | 6.79 ± 2.55    | 8.13 ± 2.86    | 7.48 ± 2.29    |
|                                   | Insulin | uU/ml    | 8.83 ± 5.97    | 9.74 ± 8       | 7.65 ± 6.38    | 7.97 ± 5.59    |
|                                   | HbA1C   | %        | 7.27 ± 1.3     | 7.32 ± 1.32    | 7.43 ± 1.38    | 7.85 ± 1.37    |
|                                   | HOMA-IR | NR       | 3.5 ± 3.15     | 3.18 ± 3.62    | 2.63 ± 2.09    | 2.96 ± 3.49    |
| Dehghan P <i>et al.</i>           | FPG     | mg/dl    | 161.7 ± 15.1   | 146.6 ± 19.9   | 157.8 ± 10.6   | 156.1 ± 14.2   |
|                                   | Insulin | uU/ml    | 14 ± 4.3       | 9.2 ± 3.2      | 13.2 ± 3.8     | 13.4 ± 3.8     |
|                                   | HbA1C   | %        | 8.4 ± 0.9      | 7.7 ± 0.7      | 8.2 ± 0.9      | 8.3 ± 1.1      |
|                                   | HOMA-IR | NR       | 5.6 ± 2        | 3.4 ± 1.4      | 5.1 ± 1.6      | 5.2 ± 1.6      |
| Dehghan P <i>et al.</i>           | FPG     | mg/dl    | 166.8 ± 22.3   | 148.5 ± 20.4   | 157.8 ± 10.6   | 156.1 ± 14.2   |
|                                   | HbA1C   | %        | 8.4 ± 1        | 7.8 ± 0.9      | 8.2 ± 0.9      | 8.3 ± 1.1      |
| Dehghan P <i>et al.</i>           | FPG     | mg/dl    | 164.81 ± 19.27 | 150.56 ± 21    | 159.79 ± 12    | 162.32 ± 17.9  |
|                                   | HbA1C   | %        | 8.25 ± 0.9     | 7.74 ± 0.75    | 8.22 ± 0.9     | 8.43 ± 1.06    |
| Ghavami A <i>et al.</i>           | FPG     | mg/dl    | 130 ± 36.25    | 119.28 ± 30.75 | 127.64 ± 24.19 | 130.36 ± 27.85 |
|                                   | Insulin | uU/ml    | 4.99 ± 1.4     | 5.2 ± 1.75     | 5.42 ± 1.56    | 5.38 ± 1.56    |
|                                   | HbA1C   | %        | 8.04 ± 2.45    | 7.62 ± 1.85    | 7.02 ± 1.6     | 7.79 ± 1.29    |
|                                   | HOMA-IR | NR       | 1.53 ± 0.53    | 1.55 ± 0.69    | 1.71 ± 0.6     | 1.72 ± 0.61    |
| Farhangi MA <i>et al.</i>         | FPG     | mg/dl    | 164.81 ± 19.27 | 150.56 ± 21    | 159.79 ± 12    | 162.32 ± 17.96 |
|                                   | Insulin | uU/dl    | 13.68 ± 5      | 10.9 ± 4.9     | 13.18 ± 3.84   | 13.43 ± 10.91  |
|                                   | HbA1C   | %        | 8.25 ± 0.9     | 7.74 ± 0.75    | 8.22 ± 0.9     | 8.43 ± 1.06    |
| Roshanravan N <i>et al.</i>       | FPG     | mg/dl    | 167.07 ± 82.17 | 144.47 ± 57.08 | 129.53 ± 26.38 | 130.87 ± 23.47 |
|                                   | Insulin | uU/ml    | 5.46 ± 1.84    | 5.1 ± 1.69     | 5.58 ± 1.67    | 5.18 ± 1.1     |
|                                   | HbA1C   | mmol/mol | 70.71 ± 29.96  | 64.87 ± 22.44  | 57.74 ± 19.48  | 55.56 ± 13.84  |
|                                   | HOMA-IR | NR       | 2.08 ± 0.97    | 1.75 ± 0.78    | 1.77 ± 0.66    | 1.66 ± 0.48    |
| Shakeri H <i>et al.</i>           | FPG     | mg/dl    | 142.7 ± 58.7   | 127.1 ± 39.7   | 129.7 ± 37     | 123.7 ± 38.9   |
| Tajabadi-Ebrahimi M <i>et al.</i> | FPG     | mg/dl    | 142.9 ± 57.2   | 131.6 ± 35.2   | 130.3 ± 39.2   | 126.6 ± 39.9   |
|                                   | Insulin | uU/ml    | 10.1 ± 5.5     | 6.9 ± 1.2      | 8.2 ± 2.7      | 7.9 ± 2.2      |
|                                   | HOMA-IR | NR       | 3.8 ± 2.9      | 2.3 ± 0.7      | 2.7 ± 1.4      | 2.5 ± 1.2      |

Data are shown as mean ± SD. FPG, fasting plasma glucose; HOMA-IR, homeostasis model assessment for insulin resistance.
